# Supplementary material
Source: publisher figshare collection journal article supplement (https://gsajournals.figshare.com/ndownloader/files/27375905)
Supplement: Supplementary file 1 [file 27375905]

## Sheet: Feuil1
Table S2: names of the strains used to contruct the phylogenic tree
name of the strain	accesion number	sud-clade	origin	ref	HIV status	Isolation source	continent
BK3	ERR1671599	VNIa-5	Clinical	Ashton et al. 2019.	positive	Vietnam	Asia
BK5	ERR1671600	VNIa-4	Clinical	Ashton et al. 2019.	positive	Vietnam	Asia
BK7	ERR1671601	VNIa-4	Clinical	Ashton et al. 2019.	positive	Vietnam	Asia
BK8	ERR1671602	VNIb	Clinical	Ashton et al. 2019.	positive	Vietnam	Asia
BK12	ERR1671604	VNIa-93	Clinical	Ashton et al. 2019.	positive	Vietnam	Asia
BK13	ERR1671605	VNIa-4	Clinical	Ashton et al. 2019.	positive	Vietnam	Asia
BK14	ERR1671606	VNIa-4	Clinical	Ashton et al. 2019.	positive	Vietnam	Asia
BK19	ERR1671607	VNIa-32	Clinical	Ashton et al. 2019.	positive	Vietnam	Asia
BK21	ERR1671608	VNIa-5	Clinical	Ashton et al. 2019.	positive	Vietnam	Asia
BK22	ERR1671609	VNIa-5	Clinical	Ashton et al. 2019.	positive	Vietnam	Asia
BK23	ERR1671610	VNIa-4	Clinical	Ashton et al. 2019.	positive	Vietnam	Asia
BK24	ERR1671611	VNIa-93	Clinical	Ashton et al. 2019.	positive	Vietnam	Asia
BK25	ERR1671612	VNIa-5	Clinical	Ashton et al. 2019.	positive	Vietnam	Asia
BK33	ERR1671613	VNIa-93	Clinical	Ashton et al. 2019.	positive	Vietnam	Asia
BK37	ERR1671614	VNIa-5	Clinical	Ashton et al. 2019.	positive	Vietnam	Asia
BK41	ERR1671615	VNIa-5	Clinical	Ashton et al. 2019.	positive	Vietnam	Asia
BK42	ERR1671616	VNIa-5	Clinical	Ashton et al. 2019.	positive	Vietnam	Asia
BK45	ERR1671617	VNIa-5	Clinical	Ashton et al. 2019.	positive	Vietnam	Asia
BK46	ERR1671618	VNIa-32	Clinical	Ashton et al. 2019.	positive	Vietnam	Asia
BK48	ERR1671619	VNIa-4	Clinical	Ashton et al. 2019.	positive	Vietnam	Asia
BK49	ERR1671620	VNIa-5	Clinical	Ashton et al. 2019.	positive	Vietnam	Asia
BK51	ERR1671621	VNIa-5	Clinical	Ashton et al. 2019.	positive	Vietnam	Asia
BK53	ERR1671622	VNIa-4	Clinical	Ashton et al. 2019.	positive	Vietnam	Asia
BK57	ERR1671623	VNIa-4	Clinical	Ashton et al. 2019.	positive	Vietnam	Asia
BK58	ERR1671624	VNIa-4	Clinical	Ashton et al. 2019.	positive	Vietnam	Asia
BK59	ERR1671625	VNIa-4	Clinical	Ashton et al. 2019.	positive	Vietnam	Asia
BK60	ERR1671626	VNIa-5	Clinical	Ashton et al. 2019.	positive	Vietnam	Asia
BK61	ERR1671627	VNIa-4	Clinical	Ashton et al. 2019.	positive	Vietnam	Asia
BK63	ERR1671628	VNIa-5	Clinical	Ashton et al. 2019.	positive	Vietnam	Asia
BK64	ERR1671629	VNIa-4	Clinical	Ashton et al. 2019.	positive	Vietnam	Asia
BK66	ERR1671630	VNIa-32	Clinical	Ashton et al. 2019.	positive	Vietnam	Asia
BK68	ERR1671631	VNIa-32	Clinical	Ashton et al. 2019.	positive	Vietnam	Asia
BK69	ERR1671632	VNIa-4	Clinical	Ashton et al. 2019.	positive	Vietnam	Asia
BK71	ERR1671633	VNIa-4	Clinical	Ashton et al. 2019.	positive	Vietnam	Asia
BK72	ERR1671634	VNIa-93	Clinical	Ashton et al. 2019.	positive	Vietnam	Asia
BK73	ERR1671635	VNIa-4	Clinical	Ashton et al. 2019.	positive	Vietnam	Asia
BK74	ERR1671636	VNIa-4	Clinical	Ashton et al. 2019.	positive	Vietnam	Asia
BK76	ERR1671637	VNIa-5	Clinical	Ashton et al. 2019.	positive	Vietnam	Asia
BK79	ERR1671638	VNIa-4	Clinical	Ashton et al. 2019.	positive	Vietnam	Asia
BK80	ERR1671639	VNIa-4	Clinical	Ashton et al. 2019.	positive	Vietnam	Asia
BK81	ERR1671640	VNIa-32	Clinical	Ashton et al. 2019.	positive	Vietnam	Asia
BK82	ERR1671641	VNIa-5	Clinical	Ashton et al. 2019.	positive	Vietnam	Asia
BK83	ERR1671642	VNIa-4	Clinical	Ashton et al. 2019.	positive	Vietnam	Asia
BK84	ERR1671643	VNIa-4	Clinical	Ashton et al. 2019.	positive	Vietnam	Asia
BK85	ERR1671644	VNIa-93	Clinical	Ashton et al. 2019.	positive	Vietnam	Asia
BK86	ERR1671645	VNIa-4	Clinical	Ashton et al. 2019.	positive	Vietnam	Asia
BK88	ERR1671646	VNIa-4	Clinical	Ashton et al. 2019.	positive	Vietnam	Asia
BK89	ERR1671647	VNIa-4	Clinical	Ashton et al. 2019.	positive	Vietnam	Asia
BK90	ERR1671648	VNIa-4	Clinical	Ashton et al. 2019.	positive	Vietnam	Asia
BK91	ERR1671649	VNIa-5	Clinical	Ashton et al. 2019.	positive	Vietnam	Asia
BK92	ERR1671650	VNIa-32	Clinical	Ashton et al. 2019.	positive	Vietnam	Asia
BK93	ERR1671651	VNIa-4	Clinical	Ashton et al. 2019.	positive	Vietnam	Asia
BK94	ERR1671652	VNIa-5	Clinical	Ashton et al. 2019.	positive	Vietnam	Asia
BK95	ERR1671653	VNIa-4	Clinical	Ashton et al. 2019.	positive	Vietnam	Asia
BK96	ERR1671654	VNIa-4	Clinical	Ashton et al. 2019.	positive	Vietnam	Asia
BK97	ERR1671655	VNIa-5	Clinical	Ashton et al. 2019.	positive	Vietnam	Asia
BK98	ERR1671656	VNIa-4	Clinical	Ashton et al. 2019.	positive	Vietnam	Asia
BK99	ERR1671657	VNIa-5	Clinical	Ashton et al. 2019.	positive	Vietnam	Asia
BK100	ERR1671658	VNIa-4	Clinical	Ashton et al. 2019.	positive	Vietnam	Asia
BK106	ERR1671659	VNIa-4	Clinical	Ashton et al. 2019.	positive	Vietnam	Asia
BK108	ERR1671660	VNIa-93	Clinical	Ashton et al. 2019.	positive	Vietnam	Asia
BK109	ERR1671661	VNIa-4	Clinical	Ashton et al. 2019.	positive	Vietnam	Asia
BK112	ERR1671662	VNIa-93	Clinical	Ashton et al. 2019.	positive	Vietnam	Asia
BK113	ERR1671663	VNIa-4	Clinical	Ashton et al. 2019.	positive	Vietnam	Asia
BK115	ERR1671664	VNIa-5	Clinical	Ashton et al. 2019.	positive	Vietnam	Asia
BK116	ERR1671665	VNIa-5	Clinical	Ashton et al. 2019.	positive	Vietnam	Asia
BK117	ERR1671666	VNIa-5	Clinical	Ashton et al. 2019.	positive	Vietnam	Asia
BK129	ERR1671667	VNIa-93	Clinical	Ashton et al. 2019.	positive	Vietnam	Asia
BK132	ERR1671668	VNIa-93	Clinical	Ashton et al. 2019.	positive	Vietnam	Asia
BK134	ERR1671669	VNIa-4	Clinical	Ashton et al. 2019.	positive	Vietnam	Asia
BK137	ERR1671671	VNIa-4	Clinical	Ashton et al. 2019.	positive	Vietnam	Asia
BK141	ERR1671672	VNIa-5	Clinical	Ashton et al. 2019.	positive	Vietnam	Asia
BK143	ERR1671673	VNIa-4	Clinical	Ashton et al. 2019.	positive	Vietnam	Asia
BK149	ERR1671674	VNIa-4	Clinical	Ashton et al. 2019.	positive	Vietnam	Asia
BK151	ERR1671675	VNIa-4	Clinical	Ashton et al. 2019.	positive	Vietnam	Asia
BK157	ERR1671676	VNIa-93	Clinical	Ashton et al. 2019.	positive	Vietnam	Asia
BK158	ERR1671677	VNIa-outlier	Clinical	Ashton et al. 2019.	positive	Vietnam	Asia
BK160	ERR1671678	VNIa-5	Clinical	Ashton et al. 2019.	positive	Vietnam	Asia
BK162	ERR1671679	VNIa-93	Clinical	Ashton et al. 2019.	positive	Vietnam	Asia
BK163	ERR1671680	VNIa-4	Clinical	Ashton et al. 2019.	positive	Vietnam	Asia
BK165	ERR1671681	VNIa-4	Clinical	Ashton et al. 2019.	positive	Vietnam	Asia
BK166	ERR1671682	VNIa-93	Clinical	Ashton et al. 2019.	positive	Vietnam	Asia
BK169	ERR1671683	VNIa-5	Clinical	Ashton et al. 2019.	positive	Vietnam	Asia
BK172	ERR1671684	VNIa-4	Clinical	Ashton et al. 2019.	positive	Vietnam	Asia
BK175	ERR1671685	VNIa-5	Clinical	Ashton et al. 2019.	positive	Vietnam	Asia
BK178	ERR1671686	VNIa-4	Clinical	Ashton et al. 2019.	positive	Vietnam	Asia
BK181	ERR1671687	VNIa-5	Clinical	Ashton et al. 2019.	positive	Vietnam	Asia
BK182	ERR1671688	VNIa-4	Clinical	Ashton et al. 2019.	positive	Vietnam	Asia
BK184	ERR1671689	VNIa-5	Clinical	Ashton et al. 2019.	positive	Vietnam	Asia
BK188	ERR1671690	VNIa-4	Clinical	Ashton et al. 2019.	positive	Vietnam	Asia
BK190	ERR1671691	VNIa-5	Clinical	Ashton et al. 2019.	positive	Vietnam	Asia
BK193	ERR1671692	VNIa-4	Clinical	Ashton et al. 2019.	positive	Vietnam	Asia
BK196	ERR1671693	VNIa-5	Clinical	Ashton et al. 2019.	positive	Vietnam	Asia
BK197	ERR1671694	VNIa-5	Clinical	Ashton et al. 2019.	positive	Vietnam	Asia
BK199	ERR1671695	VNIa-4	Clinical	Ashton et al. 2019.	positive	Vietnam	Asia
BK200	ERR1671696	VNIa-4	Clinical	Ashton et al. 2019.	positive	Vietnam	Asia
BK201	ERR1671697	VNIa-5	Clinical	Ashton et al. 2019.	positive	Vietnam	Asia
BK202	ERR1671698	VNIa-4	Clinical	Ashton et al. 2019.	positive	Vietnam	Asia
BK203	ERR1671699	VNIa-4	Clinical	Ashton et al. 2019.	positive	Vietnam	Asia
BK204	ERR1671700	VNIa-4	Clinical	Ashton et al. 2019.	positive	Vietnam	Asia
BK207	ERR1671701	VNIa-5	Clinical	Ashton et al. 2019.	positive	Vietnam	Asia
BK212	ERR1671702	VNIa-4	Clinical	Ashton et al. 2019.	positive	Vietnam	Asia
BK214	ERR1671703	VNIa-5	Clinical	Ashton et al. 2019.	positive	Vietnam	Asia
BK216	ERR1671704	VNIa-4	Clinical	Ashton et al. 2019.	positive	Vietnam	Asia
BK220	ERR1671705	VNIa-4	Clinical	Ashton et al. 2019.	positive	Vietnam	Asia
BK224	ERR1671706	VNIa-4	Clinical	Ashton et al. 2019.	positive	Vietnam	Asia
BK225	ERR1671707	VNIa-4	Clinical	Ashton et al. 2019.	positive	Vietnam	Asia
BK228	ERR1671708	VNIa-93	Clinical	Ashton et al. 2019.	positive	Vietnam	Asia
BK229	ERR1671709	VNIa-5	Clinical	Ashton et al. 2019.	positive	Vietnam	Asia
BK231	ERR1671711	VNIa-4	Clinical	Ashton et al. 2019.	positive	Vietnam	Asia
BK233	ERR1671712	VNIa-5	Clinical	Ashton et al. 2019.	positive	Vietnam	Asia
BK234	ERR1671713	VNIa-4	Clinical	Ashton et al. 2019.	positive	Vietnam	Asia
BK235	ERR1671714	VNIa-4	Clinical	Ashton et al. 2019.	positive	Vietnam	Asia
BK236	ERR1671715	VNIa-5	Clinical	Ashton et al. 2019.	positive	Vietnam	Asia
BK237	ERR1671716	VNIa-93	Clinical	Ashton et al. 2019.	positive	Vietnam	Asia
BK238	ERR1671717	VNIa-4	Clinical	Ashton et al. 2019.	positive	Vietnam	Asia
BK239	ERR1671718	VNIa-4	Clinical	Ashton et al. 2019.	positive	Vietnam	Asia
BK240	ERR1671719	VNIa-4	Clinical	Ashton et al. 2019.	positive	Vietnam	Asia
BK241	ERR1671720	VNIa-5	Clinical	Ashton et al. 2019.	positive	Vietnam	Asia
BK242	ERR1671721	VNIa-5	Clinical	Ashton et al. 2019.	positive	Vietnam	Asia
BK243	ERR1671722	VNIa-93	Clinical	Ashton et al. 2019.	positive	Vietnam	Asia
BK244	ERR1671723	VNIa-4	Clinical	Ashton et al. 2019.	positive	Vietnam	Asia
BK246	ERR1671724	VNIa-4	Clinical	Ashton et al. 2019.	positive	Vietnam	Asia
BK247	ERR1671725	VNIa-4	Clinical	Ashton et al. 2019.	positive	Vietnam	Asia
BK248	ERR1671726	VNIa-4	Clinical	Ashton et al. 2019.	positive	Vietnam	Asia
BK249	ERR1671727	VNIa-5	Clinical	Ashton et al. 2019.	positive	Vietnam	Asia
BK269	ERR1671733	VNIa-5	Clinical	Ashton et al. 2019.	positive	Vietnam	Asia
BK273	ERR1671734	VNIa-93	Clinical	Ashton et al. 2019.	positive	Vietnam	Asia
BK275	ERR1671735	VNIa-5	Clinical	Ashton et al. 2019.	positive	Vietnam	Asia
BK288	ERR1671743	VNIa-5	Clinical	Ashton et al. 2019.	positive	Vietnam	Asia
BK293	ERR1671745	VNIa-5	Clinical	Ashton et al. 2019.	positive	Vietnam	Asia
BK296	ERR1671746	VNIa-5	Clinical	Ashton et al. 2019.	positive	Vietnam	Asia
BK297	ERR1671747	VNIa-5	Clinical	Ashton et al. 2019.	positive	Vietnam	Asia
BMD1646	ERR1671748	VNIa-5	Clinical	Ashton et al. 2019.	negative	Vietnam	Asia
BK29	ERR1756536	VNIa-93	Clinical	Ashton et al. 2019.	positive	Vietnam	Asia
BK34	ERR1756537	VNIa-5	Clinical	Ashton et al. 2019.	positive	Vietnam	Asia
BK38	ERR1756538	VNIa-5	Clinical	Ashton et al. 2019.	positive	Vietnam	Asia
BK47	ERR1756539	VNIa-5	Clinical	Ashton et al. 2019.	positive	Vietnam	Asia
BK77	ERR1756540	VNIa-5	Clinical	Ashton et al. 2019.	positive	Vietnam	Asia
BK78	ERR1756541	VNIa-5	Clinical	Ashton et al. 2019.	positive	Vietnam	Asia
BK128	ERR1756543	VNIa-5	Clinical	Ashton et al. 2019.	positive	Vietnam	Asia
BK138	ERR1756545	VNIa-93	Clinical	Ashton et al. 2019.	positive	Vietnam	Asia
BK139	ERR1756546	VNIa-5	Clinical	Ashton et al. 2019.	positive	Vietnam	Asia
BK140	ERR1756547	VNIa-5	Clinical	Ashton et al. 2019.	positive	Vietnam	Asia
BK142	ERR1756548	VNIa-5	Clinical	Ashton et al. 2019.	positive	Vietnam	Asia
BK145	ERR1756549	VNIa-32	Clinical	Ashton et al. 2019.	positive	Vietnam	Asia
BK146	ERR1756550	VNIa-5	Clinical	Ashton et al. 2019.	positive	Vietnam	Asia
BK179	ERR1756554	VNIa-93	Clinical	Ashton et al. 2019.	positive	Vietnam	Asia
BK185	ERR1756556	VNIa-5	Clinical	Ashton et al. 2019.	positive	Vietnam	Asia
BK186	ERR1756557	VNIa-5	Clinical	Ashton et al. 2019.	positive	Vietnam	Asia
BK187	ERR1756558	VNIa-5	Clinical	Ashton et al. 2019.	positive	Vietnam	Asia
BK206	ERR1756561	VNIa-93	Clinical	Ashton et al. 2019.	positive	Vietnam	Asia
BK213	ERR1756562	VNIa-93	Clinical	Ashton et al. 2019.	positive	Vietnam	Asia
BK251	ERR1756565	VNIa-5	Clinical	Ashton et al. 2019.	positive	Vietnam	Asia
BK255	ERR1756568	VNIa-5	Clinical	Ashton et al. 2019.	positive	Vietnam	Asia
BK256	ERR1756569	VNIa-93	Clinical	Ashton et al. 2019.	positive	Vietnam	Asia
BK258	ERR1756571	VNIa-93	Clinical	Ashton et al. 2019.	positive	Vietnam	Asia
BK259	ERR1756572	VNIa-93	Clinical	Ashton et al. 2019.	positive	Vietnam	Asia
BK277	ERR1756576	VNIa-93	Clinical	Ashton et al. 2019.	positive	Vietnam	Asia
BK283	ERR1756577	VNIa-93	Clinical	Ashton et al. 2019.	positive	Vietnam	Asia
BK289	ERR1756578	VNIa-93	Clinical	Ashton et al. 2019.	positive	Vietnam	Asia
LD1	ERR2624091	VNIa-93	Clinical	Ashton et al. 2019.	positive	Vietnam	Asia
04CN-65-043	ERR2624092	VNIa-93	Clinical	Ashton et al. 2019.	positive	Uganda	Africa
04CN-65-095	ERR2624095	VNIa-93	Clinical	Ashton et al. 2019.	positive	Uganda	Africa
04CN-65-087	ERR2624097	VNIb	Clinical	Ashton et al. 2019.	positive	Uganda	Africa
04CN-65-016	ERR2624109	VNIa-93	Clinical	Ashton et al. 2019.	positive	Uganda	Africa
BMD915	ERR2624113	VNIa-32	Clinical	Ashton et al. 2019.	negative	Vietnam	Asia
04CN-64-008	ERR2624115	VNIa-93	Clinical	Ashton et al. 2019.	positive	Uganda	Africa
04CN-03-101	ERR2624117	VNIa-93	Clinical	Ashton et al. 2019.	positive	Vietnam	Asia
04CN-63-001	ERR2624118	VNIa-93	Clinical	Ashton et al. 2019.	positive	Malawi	Africa
04CN-03-038	ERR2624120	VNIa-93	Clinical	Ashton et al. 2019.	positive	Vietnam	Asia
04CN-64-039	ERR2624131	VNIa-93	Clinical	Ashton et al. 2019.	positive	Uganda	Africa
04CN-65-106	ERR2624139	VNII	Clinical	Ashton et al. 2019.	positive	Uganda	Africa
04CN-65-059	ERR2624141	VNIa-93	Clinical	Ashton et al. 2019.	positive	Uganda	Africa
04CN-64-100	ERR2624142	VNIa-93	Clinical	Ashton et al. 2019.	positive	Uganda	Africa
04CN-65-161	ERR2624145	VNIa-32	Clinical	Ashton et al. 2019.	positive	Uganda	Africa
04CN-65-080	ERR2624147	VNIa-93	Clinical	Ashton et al. 2019.	negative	Uganda	Africa
04CN-64-059	ERR2624148	VNIa-93	Clinical	Ashton et al. 2019.	positive	Uganda	Africa
04CN-11-013	ERR2624149	VNIa-93	Clinical	Ashton et al. 2019.	positive	Vietnam	Asia
04CN-65-031	ERR2624151	VNII	Clinical	Ashton et al. 2019.	positive	Uganda	Africa
04CN-64-088	ERR2624166	VNIa-93	Clinical	Ashton et al. 2019.	positive	Uganda	Africa
04CN-65-032	ERR2624171	VNIa-X	Clinical	Ashton et al. 2019.	positive	Uganda	Africa
04CN-65-054	ERR2624172	VNIa-93	Clinical	Ashton et al. 2019.	positive	Uganda	Africa
04CN-64-042	ERR2624173	VNIa-93	Clinical	Ashton et al. 2019.	positive	Uganda	Africa
04CN-64-075	ERR2624174	VNIa-93	Clinical	Ashton et al. 2019.	positive	Uganda	Africa
04CN-03-088	ERR2624180	VNII	Clinical	Ashton et al. 2019.	positive	Vietnam	Asia
04CN-65-074	ERR2624181	VNIb	Clinical	Ashton et al. 2019.	positive	Uganda	Africa
04CN-65-125	ERR2624183	VNIb	Clinical	Ashton et al. 2019.	positive	Uganda	Africa
04CN-65-030	ERR2624184	VNIa-93	Clinical	Ashton et al. 2019.	positive	Uganda	Africa
04CN-64-053	ERR2624186	VNIa-Y	Clinical	Ashton et al. 2019.	positive	Uganda	Africa
04CN-03-050	ERR2624188	VNIa-93	Clinical	Ashton et al. 2019.	positive	Vietnam	Asia
04CN-65-071	ERR2624189	VNIa-93	Clinical	Ashton et al. 2019.	positive	Uganda	Africa
04CN-64-081	ERR2624191	VNIa-Y	Clinical	Ashton et al. 2019.	positive	Uganda	Africa
04CN-64-027	ERR2624192	VNIa-93	Clinical	Ashton et al. 2019.	positive	Uganda	Africa
04CN-64-129	ERR2624193	VNIa-93	Clinical	Ashton et al. 2019.	positive	Uganda	Africa
04CN-65-045	ERR2624196	VNIb	Clinical	Ashton et al. 2019.	positive	Uganda	Africa
04CN-65-073	ERR2624202	VNIa-Y	Clinical	Ashton et al. 2019.	positive	Uganda	Africa
BMD942	ERR2624207	VNIa-32	Clinical	Ashton et al. 2019.	negative	Vietnam	Asia
04CN-64-029	ERR2624216	VNIa-outlier	Clinical	Ashton et al. 2019.	positive	Uganda	Africa
04CN-63-037	ERR2624236	VNIa-X	Clinical	Ashton et al. 2019.	positive	Malawi	Africa
04CN-65-023	ERR2624237	VNIa-outlier	Clinical	Ashton et al. 2019.	positive	Uganda	Africa
04CN-63-012	ERR2624238	VNIa-Y	Clinical	Ashton et al. 2019.	positive	Malawi	Africa
BMD2216	ERR2624246	VNIa-32	Clinical	Ashton et al. 2019.	negative	Vietnam	Asia
04CN-63-019	ERR2624249	VNIa-32	Clinical	Ashton et al. 2019.	positive	Malawi	Africa
04CN-65-010	ERR2624268	VNIa-Y	Clinical	Ashton et al. 2019.	positive	Uganda	Africa
04CN-64-097	ERR2624270	VNIa-outlier	Clinical	Ashton et al. 2019.	positive	Uganda	Africa
04CN-65-096	ERR2624275	VNIb	Clinical	Ashton et al. 2019.	positive	Uganda	Africa
BMD2801	ERR2624299	VNIa-32	Clinical	Ashton et al. 2019.	negative	Vietnam	Asia
04CN-64-116	ERR2624300	VNIa-Y	Clinical	Ashton et al. 2019.	positive	Uganda	Africa
04CN-64-093	ERR2624306	VNIa-Y	Clinical	Ashton et al. 2019.	positive	Uganda	Africa
04CN-64-068	ERR2624317	VNIa-Y	Clinical	Ashton et al. 2019.	positive	Uganda	Africa
04CN-63-036	ERR2624319	VNIa-32	Clinical	Ashton et al. 2019.	positive	Malawi	Africa
04CN-65-027	ERR2624331	VNIa-X	Clinical	Ashton et al. 2019.	positive	Uganda	Africa
04CN-65-062	ERR2624337	VNIb	Clinical	Ashton et al. 2019.	positive	Uganda	Africa
04CN-65-130	ERR2624350	VNIa-X	Clinical	Ashton et al. 2019.	positive	Uganda	Africa
04CN-03-042	ERR2624365	VNIa-32	Clinical	Ashton et al. 2019.	positive	Vietnam	Asia
04CN-65-047	ERR2624367	VNIb	Clinical	Ashton et al. 2019.	positive	Uganda	Africa
04CN-64-019	ERR2624429	VNIb	Clinical	Ashton et al. 2019.	positive	Uganda	Africa
04CN-63-007	ERR2624448	VNIa-X	Clinical	Ashton et al. 2019.	positive	Malawi	Africa
04CN-64-127	ERR2624466	VNIa-outlier	Clinical	Ashton et al. 2019.	positive	Uganda	Africa
04CN-03-074	ERR2624467	VNII	Clinical	Ashton et al. 2019.	positive	Vietnam	Asia
04CN-65-132	ERR2624477	VNIb	Clinical	Ashton et al. 2019.	positive	Uganda	Africa
04CN-65-046	ERR2624504	VNIa-outlier	Clinical	Ashton et al. 2019.	positive	Uganda	Africa
SRR1063253	SRR1063253	VNIb	Environmental	Desjardins et al 2017.		USA	North America
SRR1063265	SRR1063265	VNIc	Clinical	Desjardins et al 2017.	positive	S. Africa	Africa
SRR1063269	SRR1063269	VNIc	Clinical	Desjardins et al 2017.	positive	S. Africa	Africa
SRR1063286	SRR1063286	VNIb	Clinical	Desjardins et al 2017.	positive	Togo	Africa
SRR1063288	SRR1063288	VNIb	Clinical	Desjardins et al 2017.	positive	Togo	Africa
PMHc1034.ENR.STOR	SRR1925890	VNIc	Clinical	Desjardins et al 2017.	positive	Botswana	Africa
Ftc132-1	SRR1925892	VNBI	Mopane tree	Desjardins et al 2017.	-	Botswana	Africa
NRHc5044.REL.INI.CLIN.ISO	SRR1925894	VNIa-Y	Clinical	Desjardins et al 2017.	positive	Botswana	Africa
PMHc1033.ENR	SRR1925899	VNBII	Clinical	Desjardins et al 2017.	unknown	Botswana	Africa
PMHc1052.ENR.STOR	SRR1925900	VNBII	Clinical	Desjardins et al 2017.	unknown	Botswana	Africa
NRHc5001.ENR	SRR1925902	VNIc	Clinical	Desjardins et al 2017.	positive	Botswana	Africa
Ftc173-1	SRR1925913	VNBI	Mopane tree	Desjardins et al 2017.	-	Botswana	Africa
PMHc1049.THER1.STOR	SRR1925935	VNBII	Clinical	Desjardins et al 2017.	unknown	Botswana	Africa
Gbc44-1	SRR1925938	VNIc	Acacia tree	Desjardins et al 2017.	-	Botswana	Africa
Ftc111-1	SRR1925955	VNBI	Mopane tree	Desjardins et al 2017.	-	Botswana	Africa
NRHc5014.ENR	SRR1925974	VNBII	Clinical	Desjardins et al 2017.	unknown	Botswana	Africa
Gbc98-1	SRR1925975	VNIc	Environmental	Desjardins et al 2017.	-	Botswana	Africa
Ftc102-1	SRR1925977	VNBI	Mopane tree	Desjardins et al 2017.	-	Botswana	Africa
Ftc153-1	SRR1925978	VNBI	Mopane tree	Desjardins et al 2017.	-	Botswana	Africa
Ftc103-1	SRR1925979	VNBI	Mopane tree	Desjardins et al 2017.	-	Botswana	Africa
Muc387-2	SRR1925985	VNBII	Mopane tree	Desjardins et al 2017.	-	Botswana	Africa
Gbc42-1	SRR1925987	VNIc	Acacia tree	Desjardins et al 2017.	-	Botswana	Africa
PMHc1002.ENR	SRR1925994	VNBII	Clinical	Desjardins et al 2017.	unknown	Botswana	Africa
PMHc1023.ENR	SRR1926004	VNII	Clinical	Rodhes et al 2017	unknown	Botswana	Africa
Ftc151-1	SRR1926005	VNBI	Mopane tree	Desjardins et al 2017.	-	Botswana	Africa
PMHc1024.ENR	SRR1926008	VNBII	Clinical	Desjardins et al 2017.	unknown	Botswana	Africa
PMHc1009.ENR	SRR1926011	VNBII	Clinical	Desjardins et al 2017.	unknown	Botswana	Africa
NRHc5031.ENR.CLIN.ISO	SRR1926020	VNBII	Clinical	Desjardins et al 2017.	unknown	Botswana	Africa
Ftc109-1	SRR1926026	VNBI	Mopane tree	Desjardins et al 2017.	-	Botswana	Africa
NRHc5048.ENR.ISO	SRR1926048	VNIc	Clinical	Desjardins et al 2017.	unknown	Botswana	Africa
PMHc1022.ENR	SRR1926056	VNIc	Clinical	Desjardins et al 2017.	unknown	Botswana	Africa
Gbc95-1	SRR1926059	VNIc	Environmental	Desjardins et al 2017.		Botswana	Africa
PMHc1035.ENR.STOR	SRR1926070	VNBII	Clinical	Desjardins et al 2017.		Botswana	Africa
PMHc1029.ENR.STOR	SRR1926072	VNBII	Clinical	Desjardins et al 2017.		Botswana	Africa
Gbc39-1	SRR1926079	VNIc	Acacia tree	Desjardins et al 2017.	-	Botswana	Africa
PMHc1018.ENR	SRR1926080	VNIa-32	Clinical	Desjardins et al 2017.	unknown	Botswana	Africa
Ftc146-1	SRR1926085	VNBI	Mopane tree	Desjardins et al 2017.		Botswana	Africa
Ftc170-1	SRR1931688	VNBI	Mopane tree	Desjardins et al 2017.		Botswana	Africa
Gbc16-1	SRR1931695	VNIc	decayed tree	Desjardins et al 2017.	-	Botswana	Africa
NRHc5008.ENR	SRR1931697	VNBII	Clinical	Desjardins et al 2017.		Botswana	Africa
NRHc5028.ENR.STOR	SRR1931698	VNIa-outlier	Clinical	Desjardins et al 2017.	positive	Botswana	Africa
Muc387-1	SRR1942887	VNBII	Mopane tree	Desjardins et al 2017.		Botswana	Africa
PMHc1047.ENR.CLIN1	SRR1942908	VNBII	Clinical	Desjardins et al 2017.		Botswana	Africa
PMHc1032.ENR	SRR1942909	VNIc	Clinical	Desjardins et al 2017.	positive	Botswana	Africa
Ftc137-1	SRR1942921	VNBI	Mopane tree	Desjardins et al 2017.		Botswana	Africa
Ftc167-1	SRR1942923	VNBI	Mopane tree	Desjardins et al 2017.		Botswana	Africa
Ftc192-1	SRR1942932	VNBI	Mopane tree	Desjardins et al 2017.		Botswana	Africa
Ftc158-2	SRR1942949	VNBI	Avian droppings	Desjardins et al 2017.		Botswana	Africa
Gbc39-2	SRR1942967	VNIc	Acacia tree	Desjardins et al 2017.	-	Botswana	Africa
NRHc5015.REL.CLIN.ISO	SRR1942971	VNIc	Clinical	Desjardins et al 2017.	positive	Botswana	Africa
Ftc168-1	SRR1942972	VNBI	Mopane tree	Desjardins et al 2017.		Botswana	Africa
PMHc1040.ENR.STOR	SRR1942988	VNIa-outlier	Clinical	Desjardins et al 2017.	unknown	Botswana	Africa
PMHc1039.ENR.STOR	SRR1943005	VNIa-Y	Clinical	Desjardins et al 2017.	positive	Botswana	Africa
PMHc1031A.ENR.INI.LP	SRR1943071	VNIc	Clinical	Desjardins et al 2017.	unknown	Botswana	Africa
Ftc134-3	SRR1943220	VNBI	Mopane tree	Desjardins et al 2017.		Botswana	Africa
SRR642223	SRR642223	VNIa-outlier	Environmental	Desjardins et al 2017.		USA	North America
SRR642845	SRR642845	VNIb	Clinical	Desjardins et al 2017.	negative	USA	North America
SRR642846	SRR642846	VNIc	Clinical	Desjardins et al 2017.	positive	Botswana	Africa
	SRR642847	VNIa-outlier	Environmental	Desjardins et al 2017.		S. Africa	Africa
SRR642849	SRR642849	VNIb	Clinical	Desjardins et al 2017.	positive	France	Europe
	SRR642852	VNIc	Clinical	Desjardins et al 2017.	positive	Botswana	Africa
	SRR642853	VNIa-outlier	Clinical	Desjardins et al 2017.	positive	Tanzania	Africa
	SRR642855	VNIb	Clinical	Desjardins et al 2017.	positive	France	Europe
	SRR642856	VNIa-outlier	Environmental	Desjardins et al 2017.		Botswana	Africa
SRR642862	SRR642862	VNIa-Y	Clinical	Desjardins et al 2017.	positive	S. Africa	Africa
SRR642863	SRR642863	VNIa-93	Clinical	Desjardins et al 2017.	positive	Brazil	South america
SRR797707	SRR797707	VNIc	Clinical	Desjardins et al 2017.	positive	Botswana	Africa
	SRR797766	VNIc	Clinical	Desjardins et al 2017.	positive	Botswana	Africa
	SRR797782	VNIc	Clinical	Desjardins et al 2017.	positive	Botswana	Africa
	SRR797807	VNIb	Clinical	Desjardins et al 2017.	positive	Australia	Australasia
	SRR798138	VNIa-outlier	Clinical	Desjardins et al 2017.	positive	S. Africa	Africa
	SRR798140	VNIa-Y	Clinical	Desjardins et al 2017.	positive	Botswana	Africa
	SRR798161	VNIc	Clinical	Desjardins et al 2017.	positive	Botswana	Africa
	SRR798180	VNIc	Clinical	Desjardins et al 2017.	positive	Botswana	Africa
	SRR798230	VNIc	Clinical	Desjardins et al 2017.	positive	Botswana	Africa
	SRR798236	VNIc	Clinical	Desjardins et al 2017.	positive	Botswana	Africa
	SRR798238	VNIc	Clinical	Desjardins et al 2017.	positive	Botswana	Africa
	SRR798243	VNIb	Clinical	Desjardins et al 2017.	positive	S. Africa	Africa
SRR798275	SRR798275	VNIa-32	Clinical	Desjardins et al 2017.	positive	Botswana	Africa
SRR798282	SRR798282	VNIc	Clinical	Desjardins et al 2017.	positive	Botswana	Africa
SRR798283	SRR798283	VNIc	Clinical	Desjardins et al 2017.	positive	S. Africa	Africa
SRR798599	SRR798599	VNIc	Clinical	Desjardins et al 2017.	positive	Botswana	Africa
SRR798703	SRR798703	VNIa-Y	Clinical	Desjardins et al 2017.	positive	S. Africa	Africa
SRR798707	SRR798707	VNIc	Clinical	Desjardins et al 2017.	positive	Botswana	Africa
SRR798708	SRR798708	VNIc	Clinical	Desjardins et al 2017.	positive	Botswana	Africa
SRR798729	SRR798729	VNIc	Clinical	Desjardins et al 2017.	positive	Botswana	Africa
SRR798807	SRR798807	VNIc	Clinical	Desjardins et al 2017.	positive	Botswana	Africa
SRR798870	SRR798870	VNIb	Clinical	Desjardins et al 2017.	positive	S. Africa	Africa
SRR798922	SRR798922	VNIc	Clinical	Desjardins et al 2017.	positive	Botswana	Africa
SRR799061	SRR799061	VNIc	Clinical	Desjardins et al 2017.	positive	Botswana	Africa
SRR836557	SRR836557	VNIb	Clinical	Desjardins et al 2017.	positive	France	Europe
SRR836558	SRR836558	VNIb	Clinical	Desjardins et al 2017.	positive	France	Europe
SRR836570	SRR836570	VNIb	Clinical	Desjardins et al 2017.	positive	France	Europe
SRR836588	SRR836588	VNIb	Clinical	Desjardins et al 2017.	positive	France	Europe
SRR836599	SRR836599	VNIb	Clinical	Desjardins et al 2017.	positive	France	Europe
SRR836604	SRR836604	VNIb	Clinical	Desjardins et al 2017.	positive	France	Europe
SRR836610	SRR836610	VNIb	Clinical	Desjardins et al 2017.	positive	France	Europe
SRR836615	SRR836615	VNIb	Clinical	Desjardins et al 2017.	positive	France	Europe
SRR836631	SRR836631	VNIb	Clinical	Desjardins et al 2017.	positive	France	Europe
SRR836648	SRR836648	VNIb	Clinical	Desjardins et al 2017.	positive	France	Europe
SRR836660	SRR836660	VNIb	Clinical	Desjardins et al 2017.	positive	France	Europe
SRR836683	SRR836683	VNIb	Clinical	Desjardins et al 2017.	positive	France	Europe
SRR836689	SRR836689	VNIb	Clinical	Desjardins et al 2017.	positive	Argentina	South America
SRR836772	SRR836772	VNIa-Y	Clinical	Desjardins et al 2017.	positive	Botswana	Africa
SRR836871	SRR836871	VNIc	Clinical	Desjardins et al 2017.	positive	Botswana	Africa
SRR836892	SRR836892	VNIa-32	Clinical	Desjardins et al 2017.	positive	India	Asia
SRR836964	SRR836964	VNIb	Environmental	Desjardins et al 2017.	-	Botswana	Africa
SRR836988	SRR836988	VNIc	Clinical	Desjardins et al 2017.	positive	Botswana	Africa
SRR837084	SRR837084	VNIb	Clinical	Desjardins et al 2017.	positive	Uganda	Africa
SRR842038	SRR842038	VNIb	Clinical	Desjardins et al 2017.	positive	France	Europe
MW-RSA3956	SRR868750	VNIc	Clinical	Desjardins et al 2017.	positive	Botswana	Africa
MW-RSA852	SRX189631	VNII/VNB	CSF/HIV+	Rhodes et al 2017	positive	S. Africa	Africa
MW-RSA4119	SRX255633	VNII	Clinical	Desjardins et al 2017.	unknown	S. Africa	Africa
Bt60	SRX255651	VNBI	CSF /HIV+	Desjardins et al 2017.	positive	Botswana	Africa
Bt22	SRX255942	VNBI	CSF /HIV+	Desjardins et al 2017.	positive	Botswana	Africa
Bt45	SRX255989	VNBI	CSF /HIV+	Desjardins et al 2017.	positive	Botswana	Africa
T4	SRX256361	VNII	oak tree	Desjardins et al 2017.	-	USA	North America
Bt163	SRX256374	VNI/VNB	CSF /HIV+	Rhodes et al 2017	positive	Botswana	Africa
Bt10	SRX256421	VNBII	CSF /HIV+	Desjardins et al 2017.	positive	Botswana	Africa
Bt96	SRX256428	VNBI	CSF /HIV+	Desjardins et al 2017.	positive	Botswana	Africa
Bt103	SRX256442	VNBII	CSF /HIV+	Desjardins et al 2017.	positive	Botswana	Africa
Bt70	SRX256505	VNBI	CSF /HIV+	Desjardins et al 2017.	positive	Botswana	Africa
Bt24	SRX256520	VNBI	CSF /HIV+	Desjardins et al 2017.	positive	Botswana	Africa
Bt46	SRX256538	VNBII	CSF /HIV+	Desjardins et al 2017.	positive	Botswana	Africa
LP-RSA1684	SRX256550	VNII	Clinical	Desjardins et al 2017.	unknown	S. Africa	Africa
Bt125	SRX273127	VNI/VNB	CSF /HIV+	Rhodes et al 2017	positive	Botswana	Africa
Bt131	SRX273133	VNI/VNB	CSF /HIV+	Rhodes et al 2018	positive	Botswana	Africa
Bt162	SRX273166	VNI/VNB	CSF /HIV+	Rhodes et al 2019	positive	Botswana	Africa
MW-RSA1327	SRX400063	VNII	Clinical	Desjardins et al 2017.	unknown	S. Africa	Africa
MW-RSA3956	SRX400067	VNII	Clinical	Desjardins et al 2017.	unknown	S. Africa	Africa
CCTP51	ERS1800287	VNII/VNB	Clinical	Rhodes et al 2017	unknown	S. Africa	Africa
106A1		VNIa-93	Pigeon excreta	This study	-	Brazil	South America
144A1		VNIa-93	Pigeon excreta	This study	-	Brazil	South America
151A1		VNIa-Y	Pigeon excreta	This study	-	Brazil	South America
176A1		VNIa-93	Pigeon excreta	This study	-	Brazil	South America
19Pb4		VNIa-93	Pigeon excreta	This study	-	Brazil	South America
1B		VNIa-Y	Pigeon excreta	This study	-	Brazil	South America
23Pb2		VNIa-Y	Pigeon excreta	This study	-	Brazil	South America
2B		VNIa-93	Pigeon excreta	This study	-	Brazil	South America
2C		VNIa-93	Pigeon excreta	This study	-	Brazil	South America
2D		VNIa-Y	Pigeon excreta	This study	-	Brazil	South America
32Bp1		VNIa-93	Pigeon excreta	This study	-	Brazil	South America
3Pb3		VNIa-Y	Pigeon excreta	This study	-	Brazil	South America
4C		VNIa-93	Pigeon excreta	This study	-	Brazil	South America
54A1		VNIa-Y	Pigeon excreta	This study	-	Brazil	South America
56A1		VNIa-Y	Pigeon excreta	This study	-	Brazil	South America
5Pb2		VNIa-93	Pigeon excreta	This study	-	Brazil	South America
68B1		VNIa-Y	Pigeon excreta	This study	-	Brazil	South America
69A1		VNIa-Y	Pigeon excreta	This study	-	Brazil	South America
81A1		VNIa-Y	Pigeon excreta	This study	-	Brazil	South America
96A1		VNIa-Y	Pigeon excreta	This study	-	Brazil	South America
Cg366		VNIb	unknown	This study	-	Brazil	South America
Cn115		VNIa-32	Clinical	This study	unknown	Brazil	South America
Cn116		VNIa-93	Clinical	This study	unknown	Brazil	South America
Cn118		VNIa-5	Clinical	This study	unknown	Brazil	South America
Cn139		VNIa-93	Clinical	This study	unknown	Brazil	South America
Cn14HC		VNBI	Clinical	This study	unknown	Brazil	South America
Cn160		VNIa-32	Clinical	This study	unknown	Brazil	South America
Cn161		VNIa-32	Clinical	This study	unknown	Brazil	South America
Cn162		VNIa-93	Clinical	This study	unknown	Brazil	South America
Cn186		VNIa-32	Clinical	This study	unknown	Brazil	South America
Cn191		VNIa-93	Clinical	This study	unknown	Brazil	South America
Cn216		VNBII	Environmental	This study	-	Brazil	South America
Cn218		VNIb	Clinical	This study	unknown	Brazil	South America
Cn222		VNIa-93	Clinical	This study	unknown	Brazil	South America
Cn223		VNIa-93	Clinical	This study	unknown	Brazil	South America
Cn225		VNBII	Environmental	This study	-	Brazil	South America
Cn271		VNIa-93	unknown	This study	-	Brazil	South America
Cn359		VNIa-93	Clinical	This study	unknown	Brazil	South America
Cn87		VNIa-93	unknown	This study	unknown	Brazil	South America
RR2605		VNIa-5	Pigeon excreta	This study	-	Brazil	South America
